# Supplementary material for: Can Insertion Sequences Proliferation Influence Genomic Plasticity? Comparative Analysis of Acinetobacter baumannii Sequence Type 78, a Persistent Clone in Italian Hospitals
Source: Front Microbiol. 2019 Sep 12;10:2080. doi: 10.3389/fmicb.2019.02080 (PMC6751323; doi:10.3389/fmicb.2019.02080)
Supplement: TABLE S2 — Insertion sequences detected with ISseeker. Number of Insertion Sequences (ISs) detected by ISseeker per each class in all genomes in analysis. [file Table_2.XLS]

## Sheet: Sheet1
	FamilyIS66_Group	FamilyIS5_GroupIS903	FamilyIS3_GroupIS51	FamilyIS30_Group	FamilyIS4_GroupIS10	FamilyIS3_GroupIS150	FamilyIS3_GroupIS3	FamilyIS1_Group	FamilyIS5_GroupIS427
2MG	28	1	7.5	3.5	3	0.5	1
25C30	41	1.5	7.5	3.5	13
20C15	48	6.5	22.5	3.5	10.5			1
3909	1		8.5	3.5				1
2RED09	32	1.5	14	3.5	7			1
14336	28	1.5	8.5	3.5	9			1
72SM01	28	1.5	7.5	3.5	2
96SM	34	2	7.5	3.5	3
103SM	33	2	7.5	3.5	4
74SM01	31	3.5	7.5	3.5	6
65SM01	28.5	1	7.5	3.5	2
68SM01	23	1	7.5	3.5	2	0.5	1
61SM01	28	1	7.5	3.5	4
5MO	36	2	7.5	3.5	5
MGTN	26.5	1.5	7.5	3.5	6
MONUR	27.5	1.5	7.5	3.5	4
TG22150	44	1	7.5	3.5	16	1	1
TG22146	41	1	7.5	3.5	16	2
TG22142	31	1	7.5	3.5	14	0.5	1
ABUH393			7.5	31.5	1
ABBL026			7.5	3.5
UH1752			7.5	3.5	1
UH5207			7.5	3.5
PR355			7.5	3.5
1096934			7.5	3.5
PR308			7.5	3.5
PR385			18.5	12			2
PR371			18.5	11			2
855125		1	7.5	3.5			1
831240			7.5	3.5			1		1
ABBL025		1	7.5	3.5
BM4587			7.5	3.5
AB900			7.5	3.5
OIFC111		1	7.5	3.5
PR333			7.5	3.5
PR373			7.5	3.5
ARLG1941		1	7.5	3.5
PR389			7.5	3.5	1
1293320			7.5	3.5		0.5
